# Supplementary material
Source: ML conference proceedings conference paper supplement (https://openaccess.thecvf.com/content/CVPR2022/html/Lee_Weakly_Supervised_Semantic_CVPR_2022_paper.html)
Supplement: Supplementary file 1 [file Lee_Weakly_Supervised_Semantic_CVPR_2022_supplemental.pdf]

# Appendix for “Weakly Supervised Semantic Segmentation using Out-of-Distribution Data”

Jungbeom Lee<sup>1</sup> Seong Joon Oh<sup>2,3</sup> Sangdoon Yun<sup>2</sup> Junsuk Choe<sup>4</sup> Eunji Kim<sup>1</sup> Sungroh Yoon<sup>1,5,\*</sup>

<sup>1</sup>Department of Electrical and Computer Engineering, Seoul National University

<sup>2</sup>NAVER AI Lab

<sup>3</sup>University of Tübingen

<sup>4</sup>Department of Computer Science and Engineering, Sogang University

<sup>5</sup>Interdisciplinary Program in AI, AIIS, ASRI, INMC, and ISRC, Seoul National University

## A1. Additional Analysis

**Examples of dining table:** We provide some examples of localization maps for “dining table” in Figure A1, mentioned in Section 4.3.3 in the main paper.

**Clustered OoD samples:** We provide examples of OoD samples clustered by the K-means clustering algorithm in Figure A2.

**More examples:** Figure A3 presents examples of localization maps obtained by IRN [1] and our method, for the PASCAL VOC dataset. Figure A4 shows examples of segmentation maps predicted by IRN [1], AdvCAM [5], and our method.

**Hyper-parameter analysis:** We analyze the sensitivity of the mIoU of the initial seed to  $\tau$  and  $\lambda$ , hyper-parameters involved in the W-OoD training. Since  $\tau$  and  $\lambda$  are dependent on each other, they must be searched jointly. As the value of  $\tau$  increases,  $\mathcal{K}$  increases, so the value of  $\mathcal{L}_d$  increases. Therefore,  $\lambda$  must decrease accordingly.

**Segmentation results in mIoU with smaller  $|\mathcal{D}_{ood}|$ :** In the main paper, we provide the quality of the initial seed by using smaller  $|\mathcal{D}_{ood}|$ . We here provide the final segmentation results with smaller  $|\mathcal{D}_{ood}|$  in Table A1.

**Comparison of per-class mIoU scores:** Table A3 shows the per-class mIoU of the final segmentation obtained by our method and recently produced methods.

Table A1. Segmentation results with smaller  $|\mathcal{D}_{ood}|$  on Pascal VOC 2012 *val* set.

| $ \mathcal{D}_{ood} $ | 0    | 20   | 500  | 5190 |
|-----------------------|------|------|------|------|
| mIoU                  | 67.5 | 68.1 | 69.0 | 69.8 |

\*Correspondence to: Sungroh Yoon (sryoon@snu.ac.kr).

Table A2. Effect of the values of two hyper-parameters  $\tau$  and  $\lambda$ .

| $\tau$ | $\lambda$ |        |        |       |
|--------|-----------|--------|--------|-------|
| 10     | 0.01      | 0.015  | 0.02   | 0.025 |
|        | 52.5      | 52.6   | 53.1   | 52.2  |
| 20     | 0.003     | 0.005  | 0.007  | 0.01  |
|        | 52.2      | 52.7   | 53.3   | 52.3  |
| 30     | 0.001     | 0.002  | 0.003  | 0.004 |
|        | 50.8      | 52.1   | 52.5   | 52.6  |
| 40     | 0.0003    | 0.0005 | 0.0007 | 0.001 |
|        | 50.8      | 50.8   | 51.0   | 50.7  |

## References

- [1] Jiwoon Ahn, Sunghyun Cho, and Suha Kwak. Weakly supervised learning of instance segmentation with inter-pixel relations. In *CVPR*, 2019. 1, 4
- [2] Jiwoon Ahn and Suha Kwak. Learning pixel-level semantic affinity with image-level supervision for weakly supervised semantic segmentation. In *CVPR*, 2018. 2
- [3] Junsong Fan, Zhaoxiang Zhang, and Tieniu Tan. Cian: Cross-image affinity net for weakly supervised semantic segmentation. *AAAI*, 2020. 2
- [4] Jungbeom Lee, Eunji Kim, Sungmin Lee, Jangho Lee, and Sungroh Yoon. Ficklenet: Weakly and semi-supervised semantic image segmentation using stochastic inference. In *CVPR*, 2019. 2
- [5] Jungbeom Lee, Eunji Kim, and Sungroh Yoon. Anti-adversarially manipulated attributions for weakly and semi-supervised semantic segmentation. In *CVPR*, 2021. 1, 2, 3, 4
- [6] Jungbeom Lee, Jihun Yi, Chaehun Shin, and Sungroh Yoon. Bbam: Bounding box attribution map for weakly supervised semantic and instance segmentation. In *CVPR*, 2021. 2
- [7] Wataru Shimoda and Keiji Yanai. Self-supervised difference detection for weakly-supervised semantic segmentation. In *ICCV*, 2019. 2

Table A3. Comparison of per-class mIoU scores for the Pascal VOC 2012 dataset.

|                                               | bkg  | aero | bike | bird | boat | bottle | bus  | car  | cat  | chair | cow  | table | dog  | horse | motor | person | plant | sheep | sofa | train | tv   | mIOU              |
|-----------------------------------------------|------|------|------|------|------|--------|------|------|------|-------|------|-------|------|-------|-------|--------|-------|-------|------|-------|------|-------------------|
| Results on PASCAL VOC 2012 validation images: |      |      |      |      |      |        |      |      |      |       |      |       |      |       |       |        |       |       |      |       |      |                   |
| PSA [2]                                       | 88.2 | 68.2 | 30.6 | 81.1 | 49.6 | 61.0   | 77.8 | 66.1 | 75.1 | 29.0  | 66.0 | 40.2  | 80.4 | 62.0  | 70.4  | 73.7   | 42.5  | 70.7  | 42.6 | 68.1  | 51.6 | 61.7              |
| CIAN [3]                                      | 88.2 | 79.5 | 32.6 | 75.7 | 56.8 | 72.1   | 85.3 | 72.9 | 81.7 | 27.6  | 73.3 | 39.8  | 76.4 | 77.0  | 74.9  | 66.8   | 46.6  | 81.0  | 29.1 | 60.4  | 53.3 | 64.3              |
| SEAM [8]                                      | 88.8 | 68.5 | 33.3 | 85.7 | 40.4 | 67.3   | 78.9 | 76.3 | 81.9 | 29.1  | 75.5 | 48.1  | 79.9 | 73.8  | 71.4  | 75.2   | 48.9  | 79.8  | 40.9 | 58.2  | 53.0 | 64.5              |
| FickleNet [4]                                 | 89.5 | 76.6 | 32.6 | 74.6 | 51.5 | 71.1   | 83.4 | 74.4 | 83.6 | 24.1  | 73.4 | 47.4  | 78.2 | 74.0  | 68.8  | 73.2   | 47.8  | 79.9  | 37.0 | 57.3  | 64.6 | 64.9              |
| SSDD [7]                                      | 89.0 | 62.5 | 28.9 | 83.7 | 52.9 | 59.5   | 77.6 | 73.7 | 87.0 | 34.0  | 83.7 | 47.6  | 84.1 | 77.0  | 73.9  | 69.6   | 29.8  | 84.0  | 43.2 | 68.0  | 53.4 | 64.9              |
| BBAM [6]                                      | 92.7 | 80.6 | 33.8 | 83.7 | 64.9 | 75.5   | 91.3 | 80.4 | 88.3 | 37.0  | 83.3 | 62.5  | 84.6 | 80.8  | 74.7  | 80.0   | 61.6  | 84.5  | 48.6 | 85.8  | 71.8 | 73.7              |
| AdvCAM [5]                                    | 89.5 | 76.9 | 33.5 | 80.3 | 63.7 | 68.6   | 89.7 | 77.9 | 87.6 | 31.6  | 77.2 | 36.2  | 82.6 | 78.7  | 73.5  | 69.8   | 51.9  | 81.9  | 43.8 | 70.9  | 52.6 | 67.5              |
| W-OoD (ResNet-101)                            | 91.2 | 80.1 | 34.0 | 82.5 | 68.5 | 72.9   | 90.3 | 80.8 | 89.3 | 32.3  | 78.9 | 31.1  | 83.6 | 79.2  | 75.4  | 74.4   | 58.0  | 81.9  | 45.2 | 81.3  | 54.8 | 69.8              |
| W-OoD (WideResNet-38)                         | 91.0 | 80.1 | 34.1 | 88.1 | 64.8 | 68.3   | 87.4 | 84.4 | 89.8 | 30.1  | 87.8 | 34.7  | 87.5 | 85.9  | 79.8  | 75.0   | 56.4  | 84.5  | 47.8 | 80.4  | 46.4 | 70.7              |
| Results on PASCAL VOC 2012 test images:       |      |      |      |      |      |        |      |      |      |       |      |       |      |       |       |        |       |       |      |       |      |                   |
| PSA [2]                                       | 89.1 | 70.6 | 31.6 | 77.2 | 42.2 | 68.9   | 79.1 | 66.5 | 74.9 | 29.6  | 68.7 | 56.1  | 82.1 | 64.8  | 78.6  | 73.5   | 50.8  | 70.7  | 47.7 | 63.9  | 51.1 | 63.7              |
| FickleNet [4]                                 | 90.3 | 77.0 | 35.2 | 76.0 | 54.2 | 64.3   | 76.6 | 76.1 | 80.2 | 25.7  | 68.6 | 50.2  | 74.6 | 71.8  | 78.3  | 69.5   | 53.8  | 76.5  | 41.8 | 70.0  | 54.2 | 65.3              |
| SSDD [7]                                      | 89.0 | 62.5 | 28.9 | 83.7 | 52.9 | 59.5   | 77.6 | 73.7 | 87.0 | 34.0  | 83.7 | 47.6  | 84.1 | 77.0  | 73.9  | 69.6   | 29.8  | 84.0  | 43.2 | 68.0  | 53.4 | 64.9              |
| BBAM [6]                                      | 92.8 | 83.5 | 33.4 | 88.9 | 61.8 | 72.8   | 90.3 | 83.5 | 87.6 | 34.7  | 82.9 | 66.1  | 83.9 | 81.1  | 78.3  | 77.4   | 55.2  | 86.7  | 58.5 | 81.5  | 66.4 | 73.7              |
| AdvCAM [5]                                    | 89.3 | 79.3 | 32.5 | 80.2 | 56.3 | 62.8   | 87.2 | 80.8 | 87.0 | 28.9  | 78.3 | 41.3  | 82.1 | 80.6  | 77.7  | 68.5   | 51.2  | 80.8  | 55.3 | 60.8  | 48.1 | 67.1 <sup>1</sup> |
| W-OoD (ResNet-101)                            | 91.4 | 85.3 | 32.8 | 79.8 | 59.0 | 68.4   | 88.1 | 82.2 | 88.3 | 27.4  | 76.7 | 38.7  | 84.3 | 81.1  | 80.3  | 72.8   | 57.8  | 82.4  | 59.5 | 79.5  | 52.6 | 69.9 <sup>2</sup> |
| W-OoD (WideResNet-38)                         | 90.9 | 83.1 | 35.6 | 89.0 | 61.5 | 63.0   | 86.2 | 80.8 | 89.9 | 29.6  | 79.6 | 40.1  | 82.1 | 81.0  | 82.6  | 74.0   | 60.1  | 85.3  | 58.0 | 71.9  | 47.0 | 70.1 <sup>3</sup> |

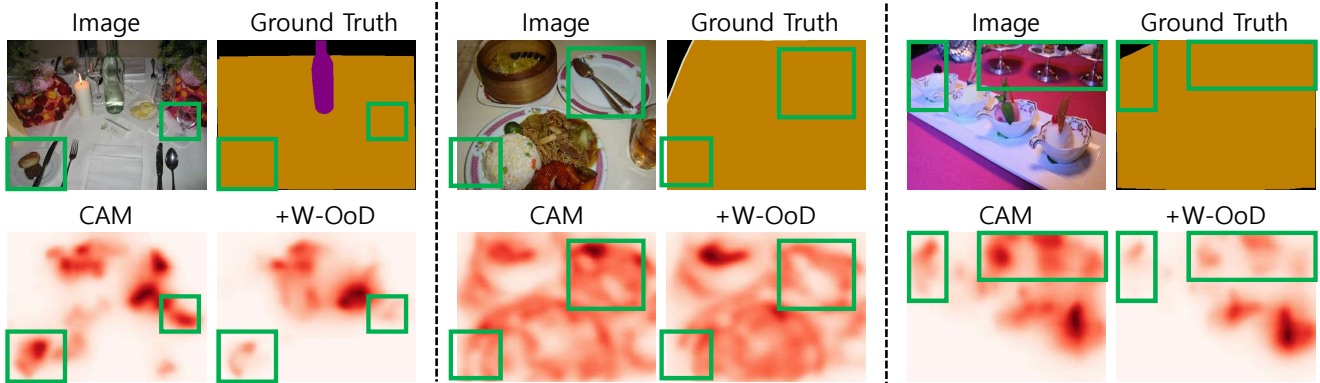

Figure A1. Example where the objects on the dining table are not identified as foreground by our method.

[8] Yude Wang, Jie Zhang, Meina Kan, Shiguang Shan, and Xilin Chen. Self-supervised equivariant attention mechanism for weakly supervised semantic segmentation. In *CVPR*, 2020. 2

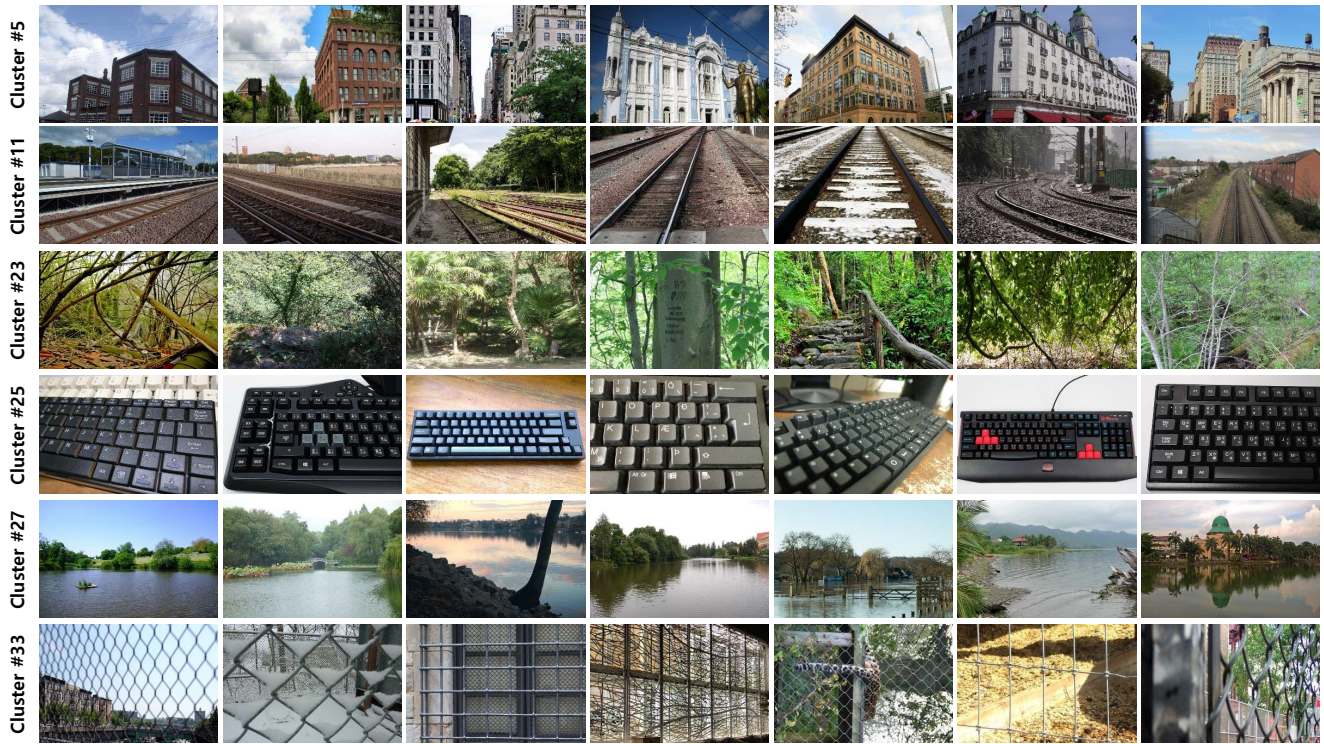

Figure A2. Examples of OoD samples for each cluster, obtained by the K-means clustering algorithm..

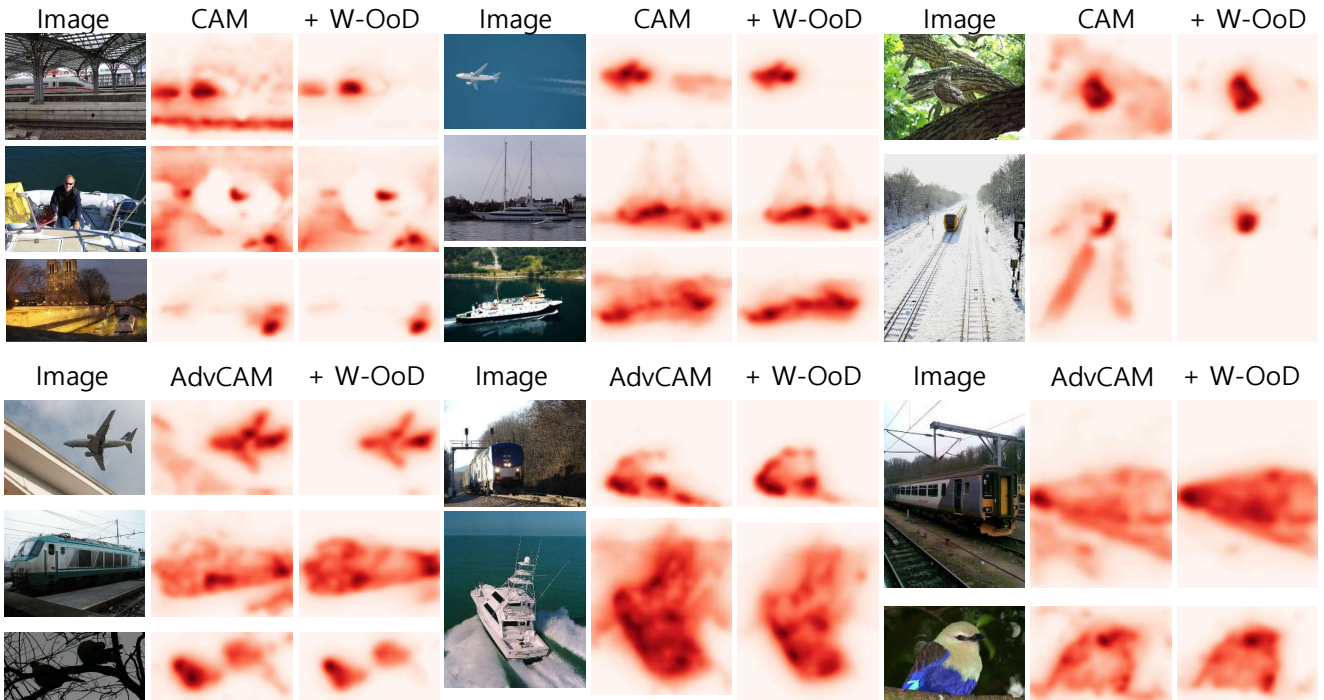

Figure A3. Examples of localization maps obtained from CAM and CAM+W-OoD (upper), and AdvCAM [5] and AdvCAM+W-OoD (lower).

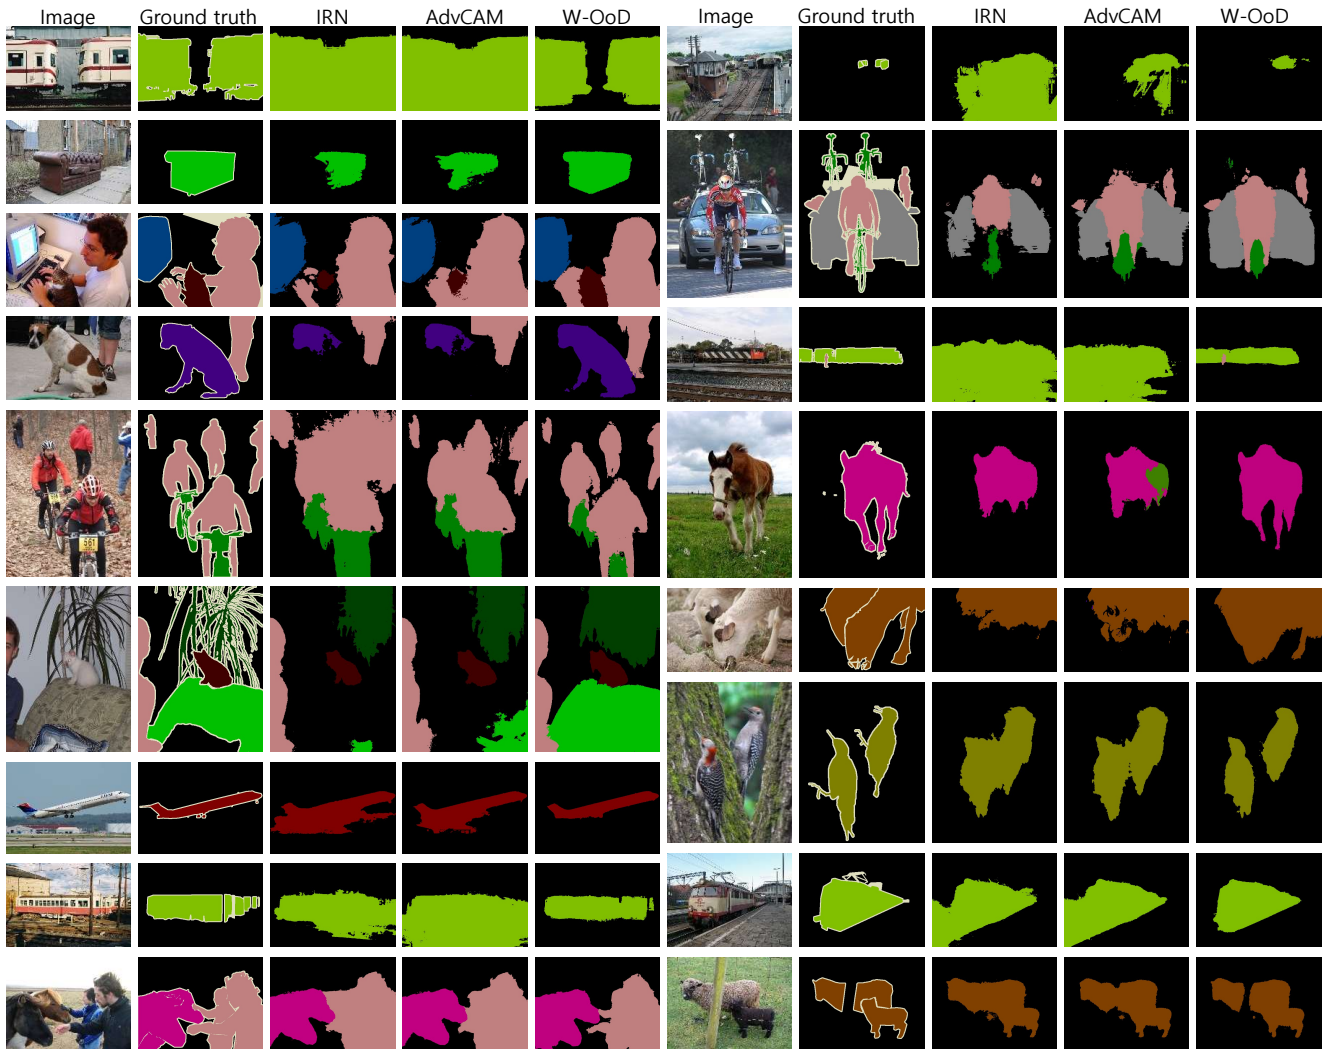

Figure A4. Examples of segmentation masks obtained by IRN [1], AdvCAM [5], and our method.
